# Supplementary material
Source: publisher figshare collection journal article supplement (https://acs.figshare.com/ndownloader/files/4174585)
Supplement: Supplementary file 1 [file 4174585]

**Supporting information for**

**Spontaneous dissociation of CO<sub>2</sub> to CO on defective surface of  
Cu(I)/TiO<sub>2-x</sub> nanoparticles at room temperature**

*Lianjun Liu, Cunyu Zhao, and Ying Li\**

University of Wisconsin-Milwaukee, Mechanical Engineering Department, 3200 N. Cramer St.

Milwaukee, WI 53211, USA

\*Corresponding Author E-mail: liying@uwm.edu

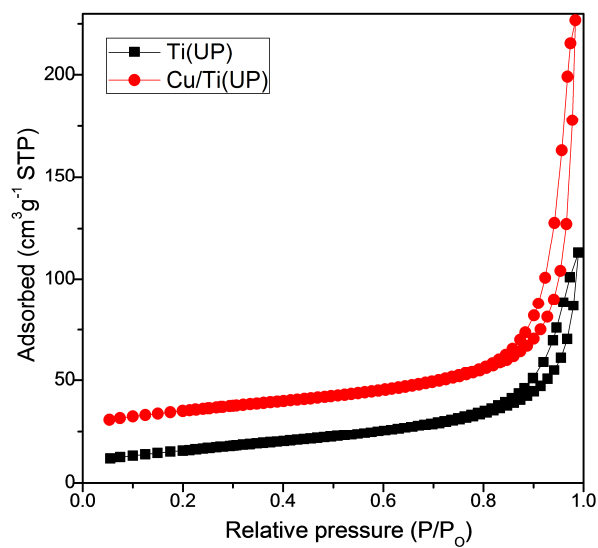

**Figure S1.** Nitrogen adsorption-desorption isotherms of Ti(UP) and Cu/Ti(UP) samples

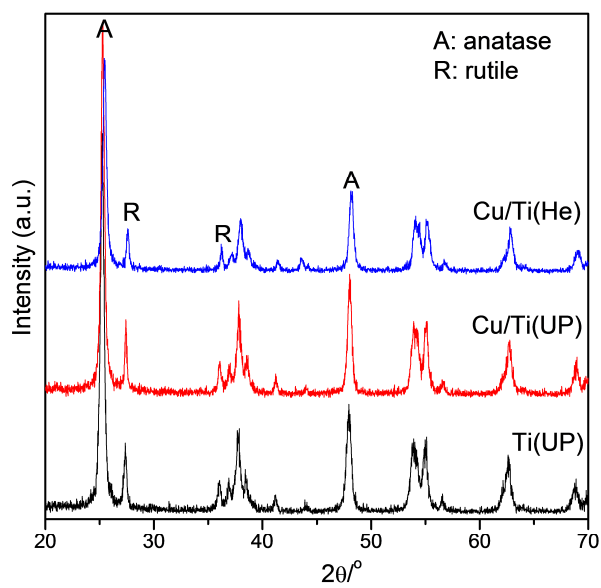

**Figure S2.** XRD patterns for Ti(UP), Cu/Ti(UP) and Cu/Ti(He) samples

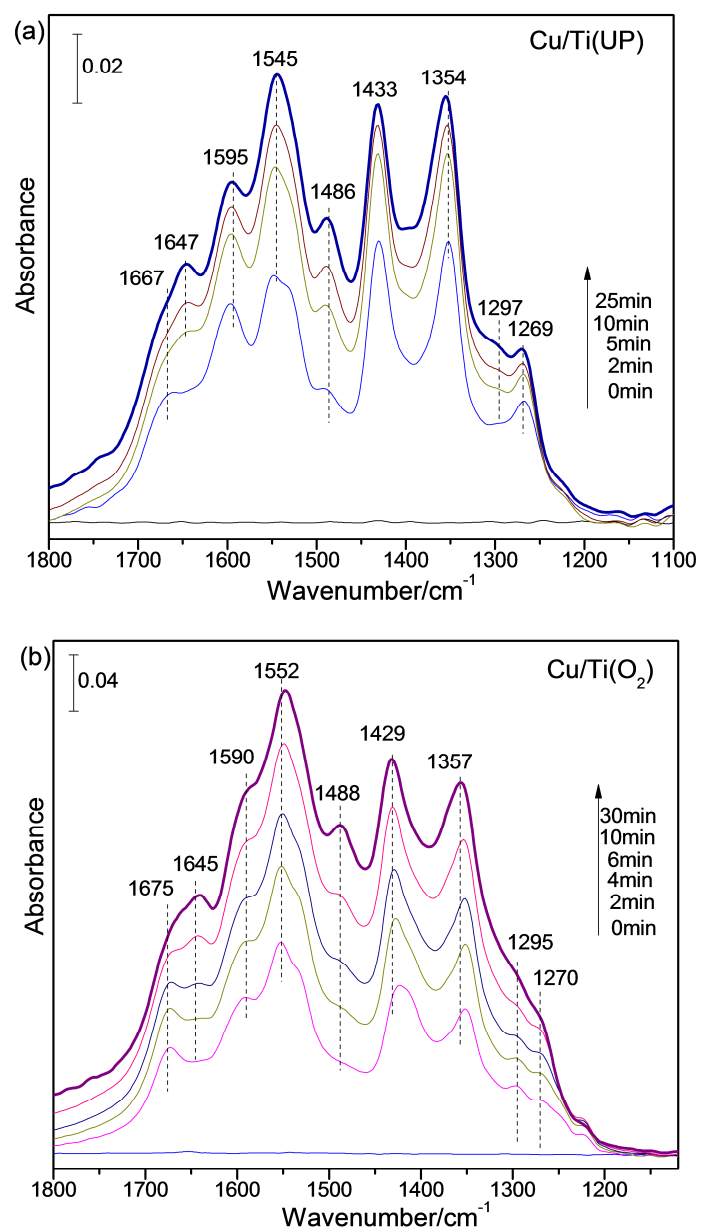

**Figure S3.** *In situ* DRIFTS spectra of CO<sub>2</sub> interaction with (a) Cu/Ti(UP) and (b) Cu/Ti(O<sub>2</sub>) at 25 °C

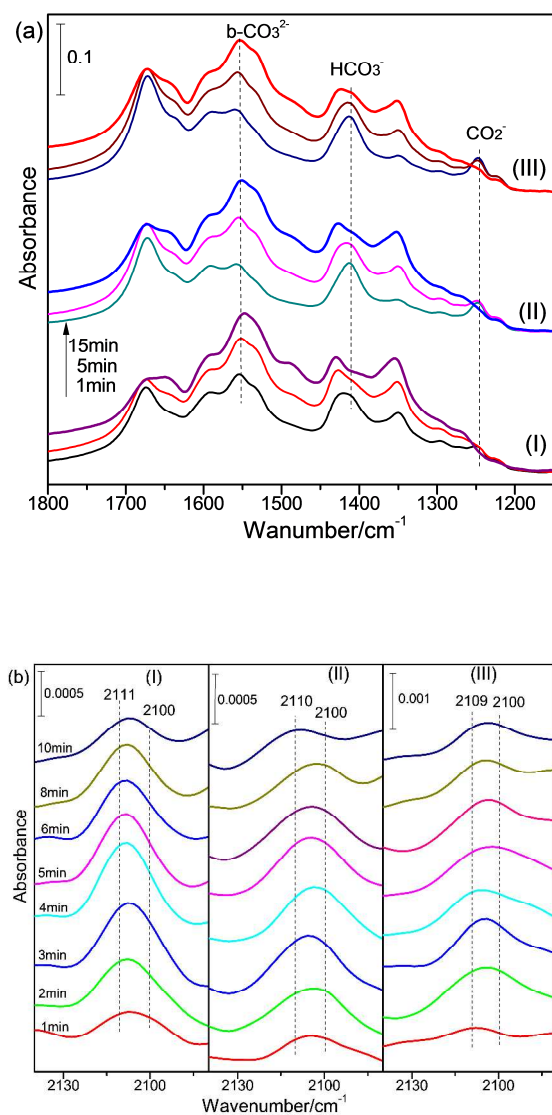

**Figure S4.** *In situ* DRIFTS spectra for CO<sub>2</sub> interaction with regenerated Cu/Ti(He) that is recycled three times: (a) adsorbed CO<sub>2</sub> species in the range of 1100-1800 cm<sup>-1</sup> and (b) the formed Cu<sup>+</sup>-CO at cycles I, II, and III.

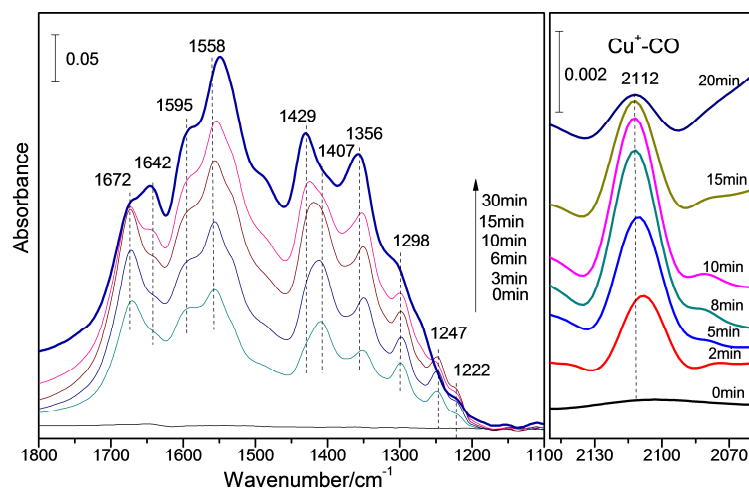

**Figure S5.** *In situ* DRIFTS spectra for adsorbed CO<sub>2</sub> species in the range of 1100-1800 cm<sup>-1</sup> and the formed Cu<sup>+</sup>-CO upon exposing Cu/Ti(He) to CO<sub>2</sub> and photo-illumination (150 W solar simulator) simultaneously.

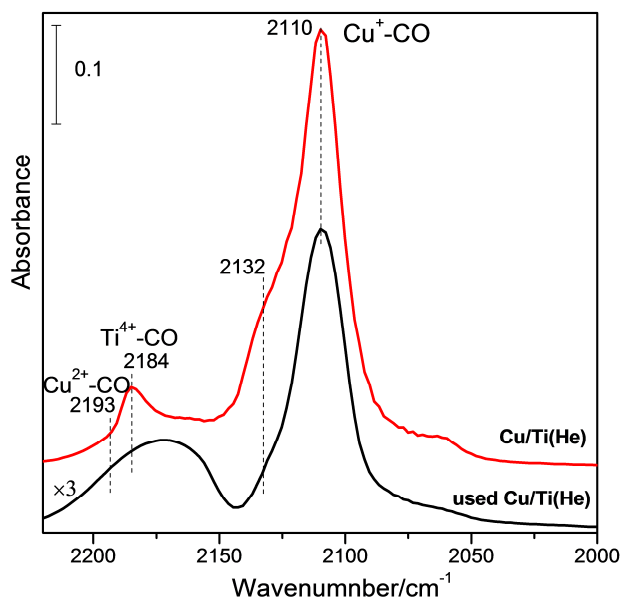

**Figure S6.** *In situ* DRIFTS spectra for CO adsorption on fresh Cu/Ti(He) and used Cu/Ti(He) after CO<sub>2</sub> photoreduction.

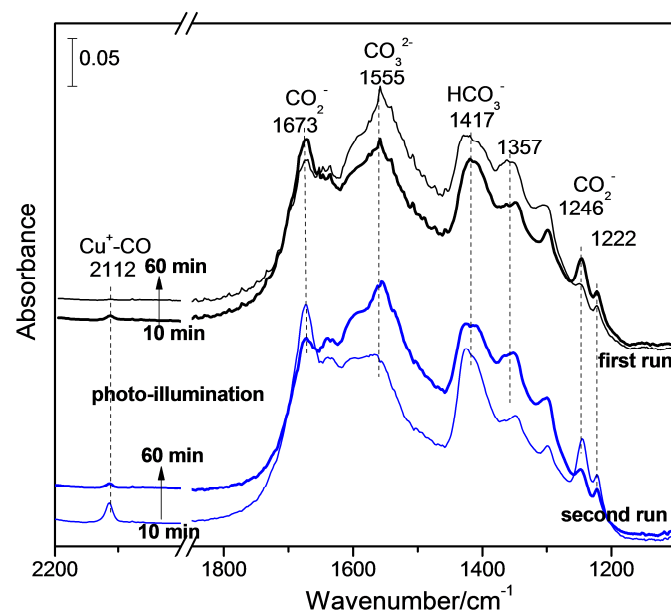

**Figure S7.** *In situ* DRIFTS spectra for CO<sub>2</sub> photoreduction on Cu/Ti(He) (first run) and regenerated Cu/Ti(He) (second run).
